# Supplementary material
Source: PubMed Central journal article supplement (PMC3164498)

# Supplemental Figure 1

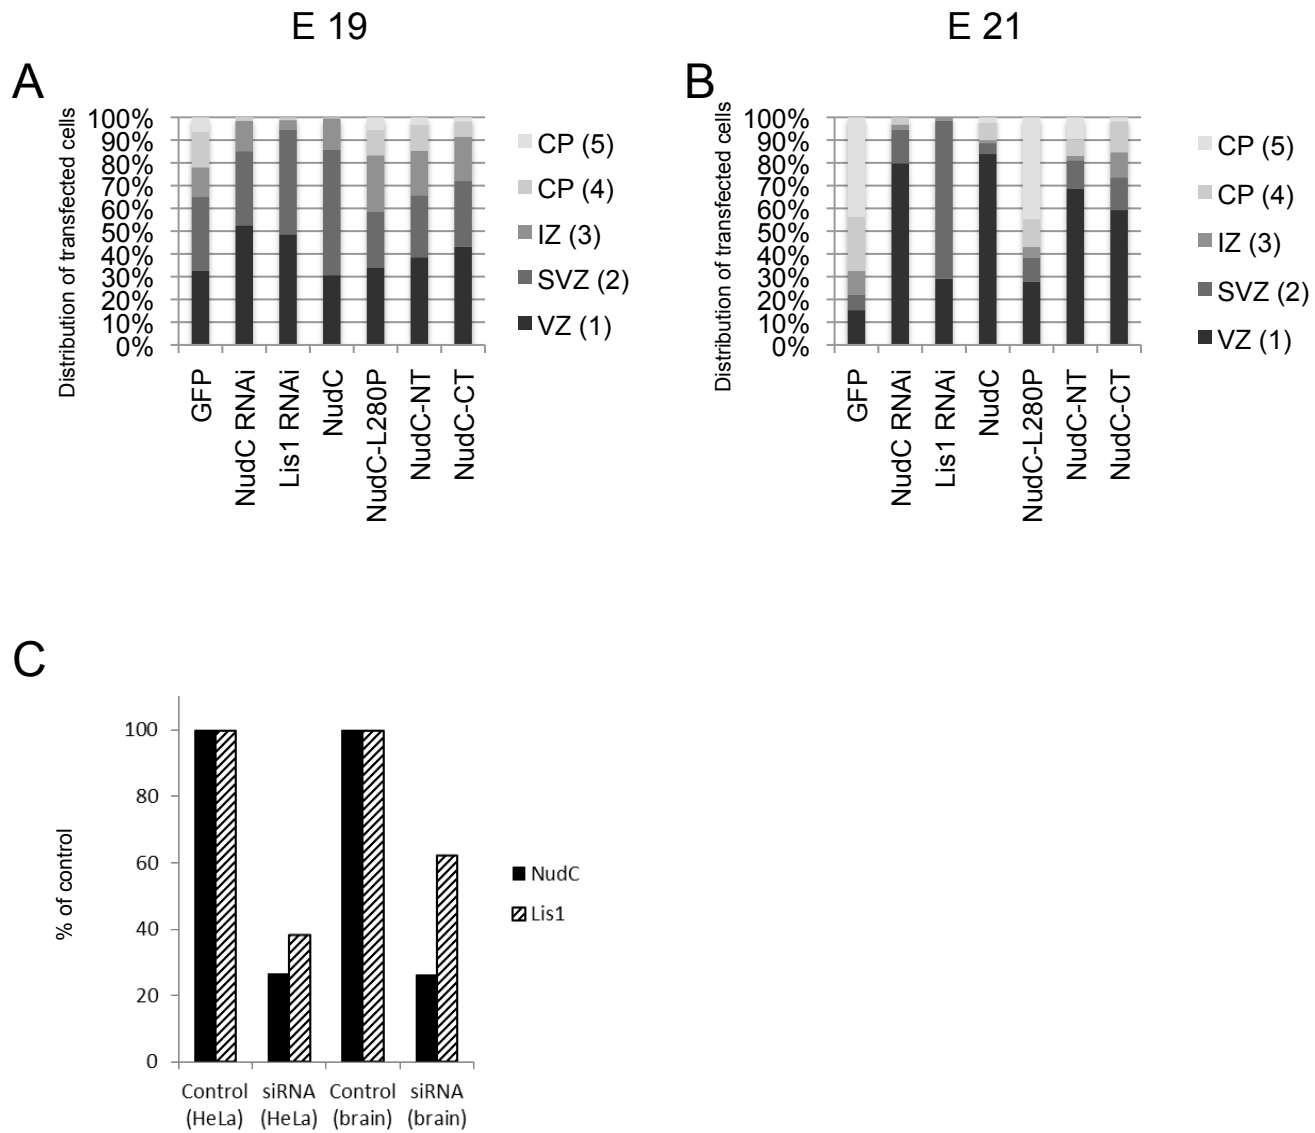

Supplement: NIHMS316898-supplement-01.pdf [file NIHMS316898-supplement-01.pdf]
